# Supplementary material for: Defining the short-term effects of pharmacological 5′-AMP activated kinase modulators on mitochondrial polarization, morphology and heterogeneity
Source: PeerJ journal article supplement (doi:10.7717/peerj.5469), 2018-08-30

# Western blots related to Fig. 5

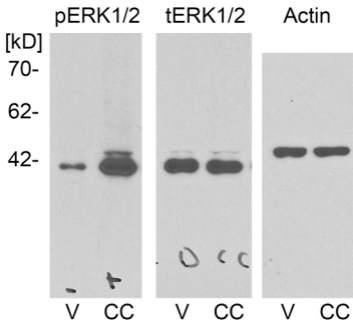

Supplement: Original_films_Figure_5.pdf [file Original_films_Figure_5.pdf]
