# Supplementary material for: Defining the short-term effects of pharmacological 5′-AMP activated kinase modulators on mitochondrial polarization, morphology and heterogeneity
Source: PeerJ. 2018 Aug 30;6:e5469. doi: 10.7717/peerj.5469 (PMC6119600; doi:10.7717/peerj.5469)
Supplement: Supplemental Information 1 — Original results for Western blots and quantitative imaging are provided. Statistical evaluations for different data sets are shown. [file peerj-06-5469-s002.xlsx]

## Sheet: Western blots
	Western blot analyses									ns = not significant
	Related to Fig. 1
	p/t Acc1	Set 1	Set 2	Set 3	Set 4	Average	STDEV	SEM	t-test
	Vehicle	1	1	1	1	1
	CC	0.317507	0.486226	0.800597	0.73291	0.58431	0.223358	0.111679	0.00982698
	Related to Fig. 3
	Tom70/ actin	Set 1	Set 2	Set 3	Average	STDEV	SEM	t-test
	Vehicle	1	1	1	1
	CC	0.651021	0.823475	1.0709	0.848464	0.211051	0.121995	0.281544
	Tom70/ actin	Set 1	Set 2	Set 3	Average	STDEV	SEM	t-test
	Vehicle	1	1	1	1
	AICAR	0.663574	0.691579	0.790406	0.715187	0.0666299	0.0385144	0.00177536
	Tom70/ actin	Set 1	Set 2	Set 3	Set 4	Set 5	Average	STDEV	SEM	One-way ANOVA
	Vehicle	1	1	1	1	1	1
	Phen	1.48288	1.9201	1.18538	2.66867	1.30086	1.71158	0.603609	0.269942	ns
	Res	1.80312	1.1413	0.871865	2.46754		1.57095	0.714399	0.357199	ns
	Related to Fig. 5
	p/t-ERK1/2	Set 1	Set 2	Set 3	Set 4	Average	STDEV	SEM	t-test
	DMSO	1	1	1	1	1
	CC	11.4467	8.82298	14.7225	18.4017	13.3485	4.14406	2.07203	0.000999312

## Sheet: Imaging, Fig. 2B
	Image quantification; related to Fig. 1B									ns = not significant
	Vehicle, Compound C: 4 sets
		Set 1	Set 2	Set 3	Set 4	Average	STDEV	SEM
	MitoTracker/ Tom70								t-test
	DMSO	1	1	1	1	1				At least 36 cells/condition and data point.
	CC	1.15074	1.37345	1.61097	1.1449	1.32001	0.221233	0.110616	0.0275855
	Tom70/ area								t-test
	DMSO	1	1	1	1	1
	CC	1.022	1.03601	0.803106	0.994004	0.96378	0.10853	0.0542649	0.529295
	MitoTracker/ area								t-test
	DMSO	1	1	1	1	1
	CC	1.17606	1.4229	1.29378	1.13803	1.25769	0.128553	0.0642766	0.00704549
	Vehicle, AICAR: 3 sets
			Set 1	Set 2	Set 3	Average	STDEV	SEM
	MitoTracker/ Tom70								t-test
	Water		1	1	1	1				At least 38 cells/condition and data point.
	AIC		1.20257	1.15154	0.673956	1.00935	0.291582	0.168544	0.958353
	Tom70/area								t-test
	Water		1	1	1	1
	AIC		0.793924	0.862698	1.03157	0.896064	0.122286	0.0706856	0.214961
	MitoTracker/ area								t-test
	Water		1	1	1	1
	AIC		0.954745	0.993432	0.695232	0.881136	0.162155	0.0937315	0.273054
	Vehicle, phenformin, resveratrol: 4 sets
		Set 1	Set 2	Set 3	Set 4	Average	STDEV	SEM	One-way ANOVA
	MitoTracker/ Tom70
	DMSO	1	1	1	1	1
	Phen	1.32897	0.895622	1.10559	0.748206	1.0196	0.253066	0.126533	ns	At least 35 cells/condition and data point.
	Res	0.957977	1.15815	1.35262	1.00496	1.11843	0.177993	0.0889963	ns
	Tom70/area
	DMSO	1	1	1	1	1
	Phen	0.800419	0.961267	0.803551	1.02259	0.896957	0.112492	0.0562462	ns
	Res	0.917421	0.956305	0.858169	0.818176	0.887518	0.0613609	0.0306804	ns
	MitoTracker/ area
	DMSO	1	1	1	1	1
	Phen	1.06373	0.860932	0.888395	0.765108	0.894541	0.12456	0.0622799	ns
	Res	0.878868	1.10755	1.16078	0.822231	0.992355	0.16679	0.0833948	ns

## Sheet: Imaging, Fig. 6B, C
	Image quantification; related to Fig. 6B, C							ns = not significantly different
	Cells	MitoTracker/ Tom70	Ring 1	Ring 2	Ring 3	Ring 4
	42	Vehicle	1	1.03677	1.05176	1.06874
	35	Vehicle	1	0.998552	0.991073	1.00114
	Average		1	1.01766	1.02142	1.03494
	SEM			0.0191641	0.0304325	0.0338976
	p-value		REFERENCE	ns	ns	ns
	35	CC	1	1.03316	1.04286	1.05152
	28	CC	1	0.998001	1.01469	1.02515
	Average		1	1.01558	1.02877	1.03834
	SEM			0.0176335	0.0141278	0.0132246
	p-value		REFERENCE	ns	ns	ns
	Cells	MitoTracker/ Tom70	Ring 1	Ring 2	Ring 3	Ring 4
	37	Vehicle	1	0.988393	1.00045	1.00579
	37	Vehicle	1	1.04236	1.0598	1.08389
	Average		1	1.01538	1.03013	1.04484
	SEM			0.0270653	0.0297628	0.039165
	p-value		REFERENCE	ns	ns	ns
	50	AICAR	1	1.00989	1.01923	1.03719
	50	AICAR	1	1.00352	1.01341	1.02994
	Average		1	1.00671	1.01632	1.03357
	SEM			0.00319213	0.00292011	0.00363687
	p-value		REFERENCE	0.167686	0.0298162	0.0032621
	Cells	MitoTracker/ Tom70	Ring 1	Ring 2	Ring 3	Ring 4
	44	Vehicle	1	1.00054	1.01991	1.04069
	34	Vehicle	1	1.00148	1.00194	1.01419
	Average		1	1.00101	1.01092	1.02744
	SEM			0.000472865	0.00901112	0.0132888
	p-value		REFERENCE	ns	ns	ns
	51	Phen	1	1.03105	1.09348	1.12759
	42	Phen	1	1.01261	1.0084	1.03457
	Average		1	1.02183	1.05094	1.08108
	SEM			0.00924954	0.0426692	0.0466467
	p-value		REFERENCE	ns	ns	ns
	47	Res	1	0.975888	0.980614	1.0029
	34	Res	1	0.996769	0.986875	1.01135
	Average		1	0.986328	0.983745	1.00712
	SEM			0.0104716	0.00313981	0.00423868
	p-value		REFERENCE	ns	ns	ns
	MCF 7	MitoTracker/ Tom70	Ring 1	Ring 2	Ring 3	Ring 4
	Average		1	1.19041	1.30678	1.41295
	SEM			0.0641805	0.115569	0.175754
	p-value		REFERENCE	0.225016	0.105182	0.0295678

## Sheet: Imaging, Fig.7A, B
	Image quantification, related to Fig. 7A, B							ns = not significant
	Cells	MitoT/ area	Ring 1	Ring 2	Ring 3	Ring 4
	42	Vehicle	1	0.898287	0.794105	0.715939
	35	Vehicle	1	0.852728	0.774316	0.706881
	Average		1	0.875507	0.784211	0.71141
	SEM			0.0228478	0.00992408	0.00454266
	p-value		REFERENCE	0.0066691	0.0008059	0.0002569
	35	CC	1	0.921051	0.867532	0.817059
	28	CC	1	0.930781	0.888081	0.857831
	Average		1	0.925916	0.877806	0.837445
	SEM			0.00487973	0.0103053	0.0204468
	p-value		REFERENCE	0.0327525	0.0053268	0.0017883
		t-test:
		vehicle vs CC		0.162896	0.0224475	0.0263723
				Ring 2	Ring 3	Ring 4
	Cells	MitoT/ area	Ring 1	Ring 2	Ring 3	Ring 4
	37	Vehicle	1	0.840163	0.739558	0.667931
	37	Vehicle	1	0.893931	0.828061	0.74967
	Average		1	0.867047	0.783809	0.708801
	SEM			0.0269646	0.0443838	0.0409914
	p-value		REFERENCE	0.139131	0.0293127	0.0100652
	50	AICAR	1	0.867404	0.763606	0.701448
	50	AICAR	1	0.877422	0.783511	0.687905
	Average		1	0.872413	0.773559	0.694676
	SEM			0.00502353	0.0099825	0.00679176
	p-value		REFERENCE	0.0004741	4.892e-05	1.4874e-05
	Cells	MitoT/ area	Ring 1	Ring 2	Ring 3	Ring 4
	44	Vehicle	1	0.90883	0.823765	0.724554
	34	Vehicle	1	0.930584	0.862404	0.797476
	Average		1	0.919707	0.843085	0.761015
	SEM			0.0109098	0.0193773	0.0365699
	p-value		REFERENCE	0.168996	0.0195442	0.004126
	51	Phen	1	0.900968	0.800931	0.733523
	42	Phen	1	0.906291	0.796568	0.726028
	Average		1	0.903629	0.798749	0.729775
	SEM			0.00266942	0.00218812	0.00375896
	p-value		REFERENCE	3.4643e-05	1.8347e-06	5.6496e-07
	47	Res	1	0.92642	0.859896	0.810133
	34	Res	1	0.975133	0.913228	0.816265
	Average		1	0.950776	0.886562	0.813199
	SEM			0.0244293	0.0267458	0.00307494
	p-value		REFERENCE	0.381547	0.0343695	0.0056504
				Ring 2	Ring 3	Ring 4
		Vehicle		0.90883	0.823765	0.724554
				0.930584	0.862404	0.797476
		Phen		0.900968	0.800931	0.733523
				0.906291	0.796568	0.726028
			p-value	ns	ns	ns
		Res		0.92642	0.859896	0.810133	One-Way ANOVA
				0.975133	0.913228	0.816265
			p-value	ns	ns	ns
	MCF 7	MitoT/ area	Ring 1	Ring 2	Ring 3	Ring 4				`
	Average		1	0.848169	0.783266	0.704364
	SEM			0.031753	0.0518064	0.0578837
	p-value		REFERENCE	0.0382202	0.0015186	1.3723e-05

## Sheet: Imaging, Fig. 8A, B
	Image quantification, related to Fig. 8A, B							ns = not significant
	Cells	Tom70/ area	Ring 1	Ring 2	Ring 3	Ring 4
	42	Vehicle	1	0.877783	0.773777	0.689446
	35	Vehicle	1	0.859275	0.794368	0.720323
	Average		1	0.868529	0.784072	0.704884
	SEM			0.00928145	0.0103259	0.0154849
	p-value		REFERENCE	0.0025681	0.0003712	0.0001079
	35	CC	1	0.90733	0.860216	0.805204
	28	CC	1	0.940484	0.88281	0.847168
	Average		1	0.923907	0.871513	0.826186
	SEM			0.0166262	0.0113306	0.0210446
	p-value		REFERENCE	0.0621178	0.0099669	0.0031976
		t-test:
		vehicle versus CC		0.100176	0.029221	0.0431553
			Ring 1 vs	Ring 2	Ring 3	Ring 4
	Cells	Tom70/ area	Ring 1	Ring 2	Ring 3	Ring 4
			Normalized to Ring 1
	37	Vehicle	1	0.850478	0.739721	0.667736
	37	Vehicle	1	0.869847	0.800759	0.709897
	Average		1	0.860162	0.77024	0.688816
	SEM			0.00971328	0.03061	0.0211432
	p-value		REFERENCE	0.0201112	0.0031858	0.000986
	50	AICAR	1	0.862932	0.751087	0.680767
	50	AICAR	1	0.88375	0.800872	0.693474
	Average		1	0.873341	0.77598	0.687121
	SEM			0.0104402	0.0249669	0.00637251
	p-value		REFERENCE	0.0088604	0.0010031	0.0002701
	t-test:			0.451815	0.897487	0.945619
	water vs AICAR
	Cells	Tom70/ area	Ring 1	Ring 2	Ring 3	Ring 4
	44	Vehicle	1	0.916002	0.827593	0.715335
	34	Vehicle	1	0.932589	0.866129	0.795151
	Average		1	0.924295	0.846861	0.755243
	SEM			0.00831841	0.0193259	0.0400274
	p-value		REFERENCE	0.229299	0.0258773	0.0046434
	51	Phen	1	0.881095	0.745216	0.669649
	42	Phen	1	0.897258	0.794866	0.706453
	Average		1	0.889176	0.770041	0.688051
	SEM			0.00810539	0.0248992	0.0184568
	p-value		REFERENCE	0.0240138	0.0015724	0.0004778
	47	Res	1	0.958871	0.900879	0.853506
	34	Res	1	0.97829	0.925662	0.814455
	Average		1	0.96858	0.91327	0.83398
	SEM			0.00973815	0.0124287	0.0195837
	p-value		REFERENCE	0.453464	0.0243007	0.0021758
				Ring 2	Ring 3	Ring 4
		DMSO		0.916002	0.827593	0.715335
				0.932589	0.866129	0.795151
		Phen		0.881095	0.745216	0.669649
				0.897258	0.794866	0.706453
		Res		0.958871	0.900879	0.853506	One-Way ANOVA
				0.97829	0.925662	0.814455
			p-value	0.0228209	0.0416107	ns
				Phen vs Res	Phen vs Res
	MCF 7	Tom70/ area	Ring 1	Ring 2	Ring 3	Ring 4
	Average		1	0.746302	0.67637	0.610047
	SEM			0.0482792	0.0790723	0.0965757
	p-value		REFERENCE	0.027615	0.0031895	0.0003142
